# Supplementary material for: 3D organic bioelectronics for electrical monitoring of human adult stem cells
Source: Royal Society of Chemistry journal article supplement (doi:10.1039/d3mh00785e), 2023-01-01
Supplement: d3mh00785e1.pdf [file d3mh00785e1.pdf]

## Supporting Information

### 3D Organic Bioelectronics for Electrical Monitoring of Human Adult Stem Cells

Achilleas Savva,<sup>1\*</sup> Janire Saez,<sup>1,2,3,4</sup> Aimee Withers,<sup>1</sup> Chiara Barberio,<sup>1</sup> Verena Stoeger,<sup>1</sup> Shani Elias-Kirma,<sup>1</sup> Zixuan Lu,<sup>1</sup> Chrysanthi-Maria Moysidou,<sup>1</sup> Konstantinos Kallitsis,<sup>1</sup> Charalampos Pitsalidis<sup>5,6,1</sup> and Róisín M. Owens.<sup>1\*</sup>

<sup>1</sup>Department of Chemical Engineering and Biotechnology, University of Cambridge, CB3 0AS Cambridge, United Kingdom

<sup>2</sup>Microfluidics Cluster UPV/EHU, BIOMICs Microfluidics Group, Lascaray Research Center, University of the Basque Country UPV/EHU, Avenida Miguel de Unamuno, 3, 01006, Vitoria-Gasteiz, Spain

<sup>3</sup>Basque Foundation for Science, IKERBASQUE, E-48011 Bilbao, Spain

<sup>4</sup>Bioaraba Health Research Institute, Microfluidics Cluster UPV/EHU, Vitoria-Gasteiz, Spain

<sup>5</sup>Department of Physics, Khalifa University of Science and Technology, P. O. Box 127788 Abu Dhabi, United Arab Emirates

<sup>6</sup>Healthcare Engineering Innovation Center (HEIC), Khalifa University of Science and Technology, Abu Dhabi, United Arab Emirates

email: [as3024@cam.ac.uk](mailto:as3024@cam.ac.uk); [rmo37@cam.ac.uk](mailto:rmo37@cam.ac.uk).

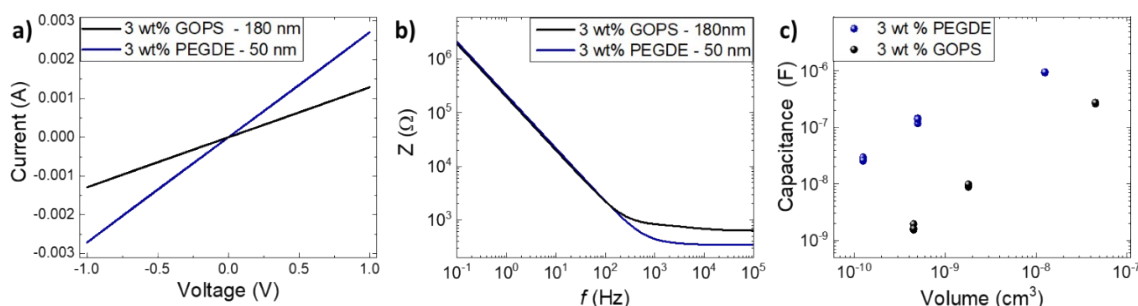

**Figure S1:** Electrical properties evaluation of PEDOT:PSS films crosslinked with 3 wt% GOPS (black symbols – thickness = 180 nm) and 3 wt % PEGDE (blue symbols thickness = 180 nm). **a)** Current vs voltage characteristics of PEDOT:PSS films cast between two gold electrodes of a fixed distance (100  $\mu\text{m}$ ). These data were used to extract the electrical conductivity of the thin films. **b)** Representative electrochemical impedance spectroscopy measurements of PEDOT:PSS films on micro-fabricated gold square electrodes with side = 500  $\mu\text{m}$ . **c)** the capacitance of PEDOT:PSS films extracted from the impedance at low frequency (i.e 0.1 Hz)

for PEDOT:PSS casted on micro-fabricated electrodes with different sizes. All measurements were performed in the aqueous electrolyte PBS 1X.

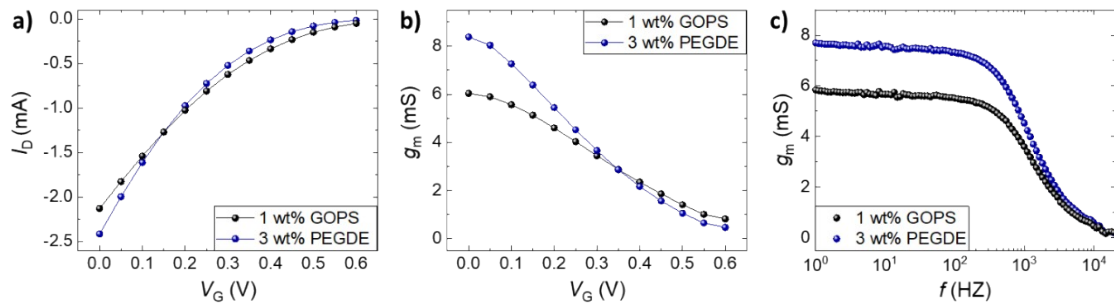

**Figure S2:** Organic electrochemical transistor characteristics of PEDOT:PSS crosslinked with 3 wt% GOPS (black symbols) and 3 wt % PEGDE (blue symbols). **a)** Transfer curves at  $V_D = -0.6$  V, **b)** transconductance ( $g_m$ ) at  $V_D = -0.6$  V as a function of gate voltage ( $V_G$ ) and **c)** transconductance ( $g_m$ ) at  $V_D = -0.6$  and  $V_G = 0$  V as a function of frequency. The cut off frequency is calculated at  $\sim 850$  Hz in both cases.

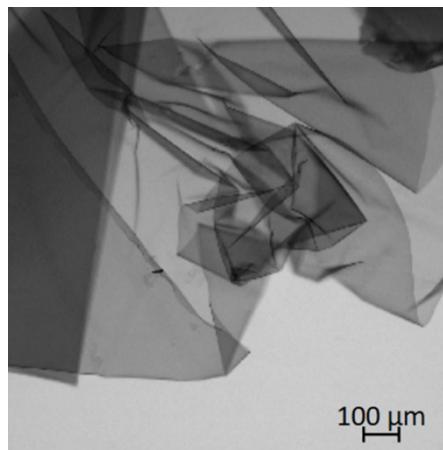

**Figure S3:** Bright field microscope image of delaminated PEDOT:PSS thin film crosslinked with 3 wt% PEGDE after 5 days immersed in cell media.

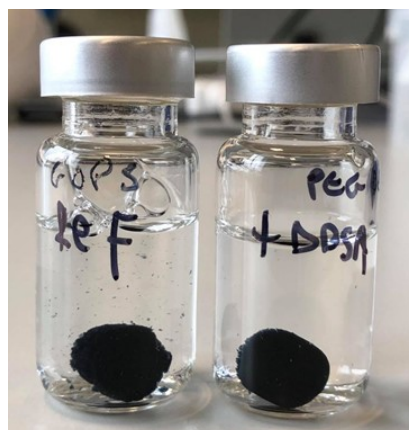

**Figure S4:** PEDOT:PSS-based scaffolds crosslinked with GOPS 3 wt% (right) and PEGDE 3 wt% (left) immersed in PBS for more than 6 months.

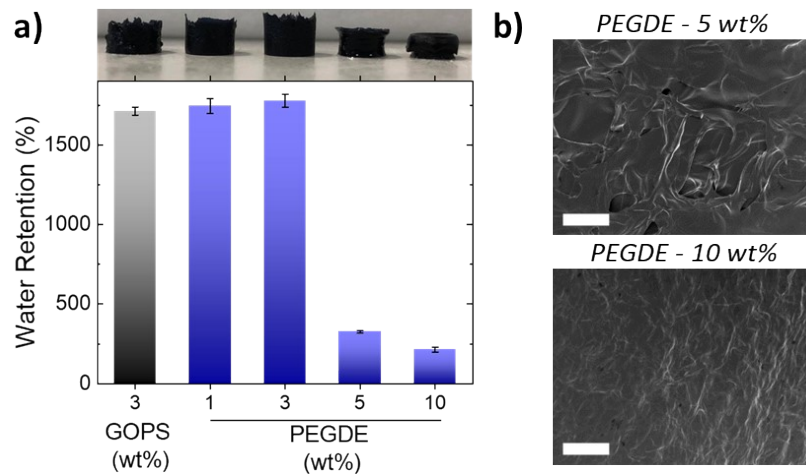

**Figure S5: a)** Water retention ability of PEDOT:PSS-based scaffolds crosslinked with GOPS 3 wt%, PEGDE 1 - 10 wt%. The digital pictures on top of the graph show the scaffolds for the corresponding concentration of crosslinker after been swollen in DI water (N=6). **b)** Scanning electron microscopy measurements of scaffolds prepared with PEGDE 5 wt% and PEGDE 10 wt%. Scale bars = 40 μm.

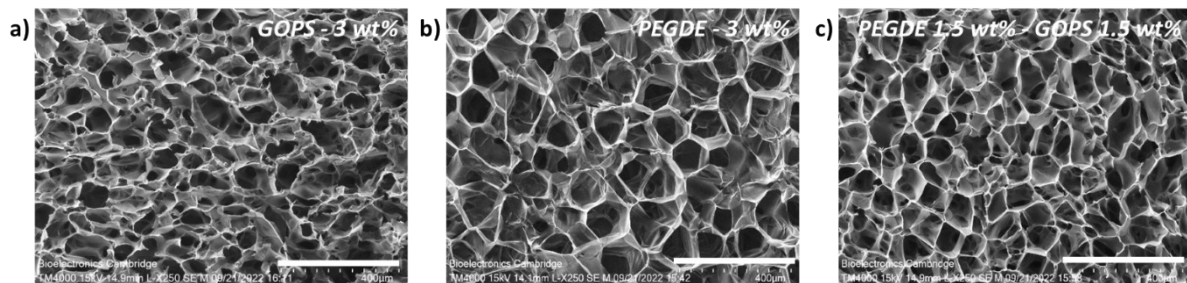

**Figure S6:** SEM measurements of PEDOT:PSS scaffolds crosslinked with **a)** GOPS 3 wt% , **b)** PEGDE 3 wt%, and **c)** a mixture of GOPS 1.5 wt%:PEGDE 1.5 wt%. Scale bars = 400 μm.

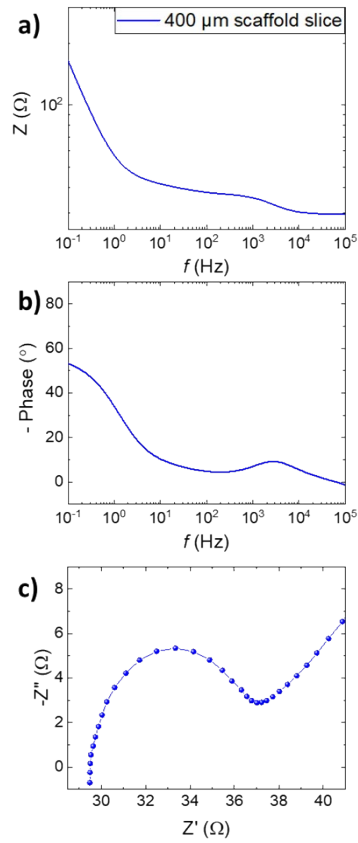

**Figure S7:** a) Impedance magnitude versus frequency b) Impedance phase and c) Nyquist plot for 3D devices made with a 400 μm thick scaffold slice.

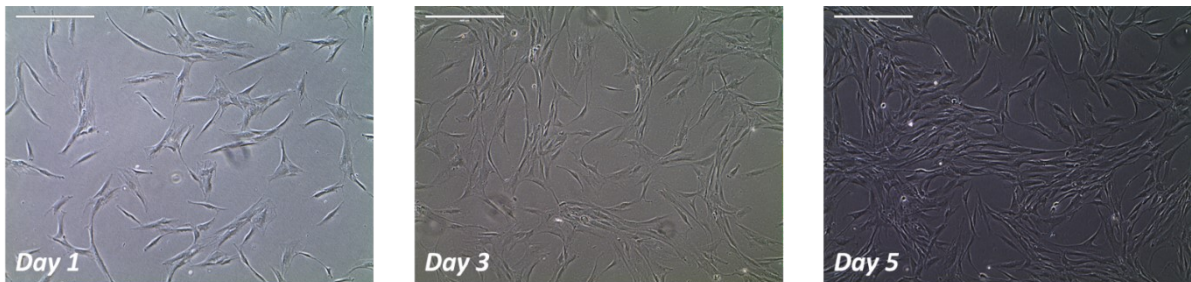

**Figure S8:** Brightfield images of human adipose derived stem cell cultures in a flat petri dish. Scale bars = 400 μm.

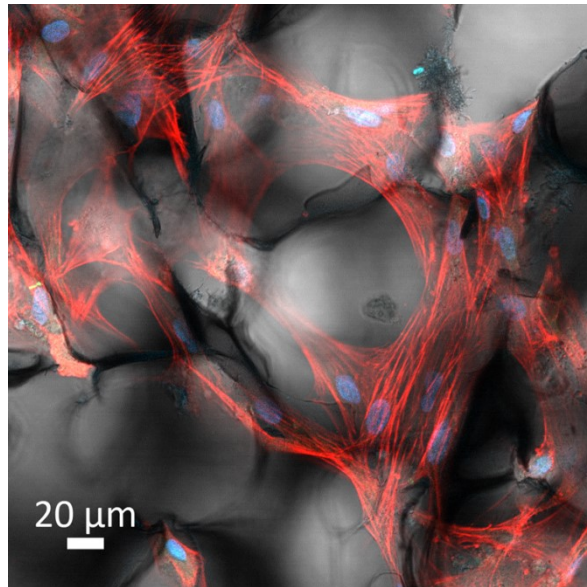

**Figure S9:** Combined bright field and fluorescent microscope image of hADSCs growing in a PEDOT:PSS-based conducting polymer scaffold.

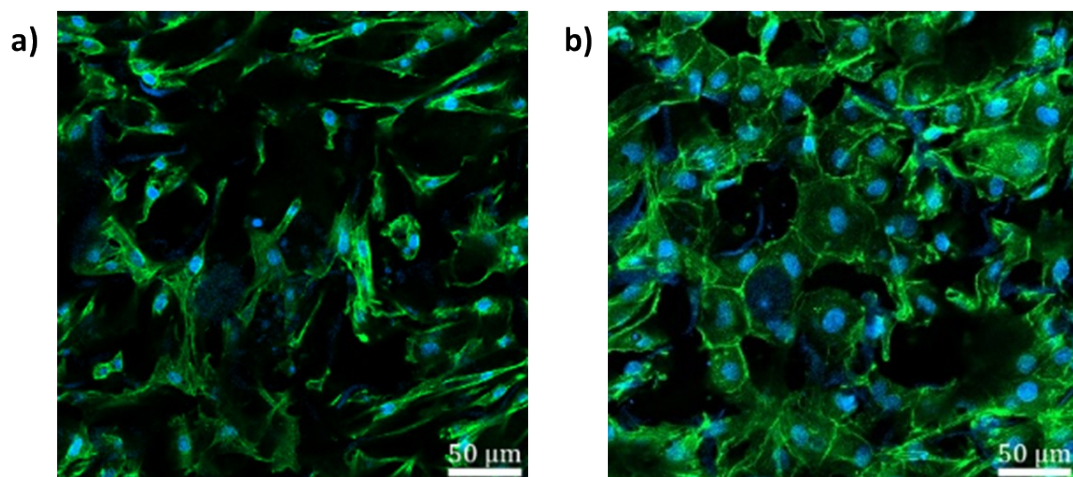

**Figure S10:** Immunofluorescence images of **a)** 3D Rat Fibroblast (ECACC, 85103116), and **b)** IEC-6, rat small intestine epithelial cells (ECACC, 88071401) cultures grown within 400 μm thick PEDOT:PSS scaffolds slices made with 3 wt% PEGDE. Stained for f-actin (green) and cell nuclei (blue).



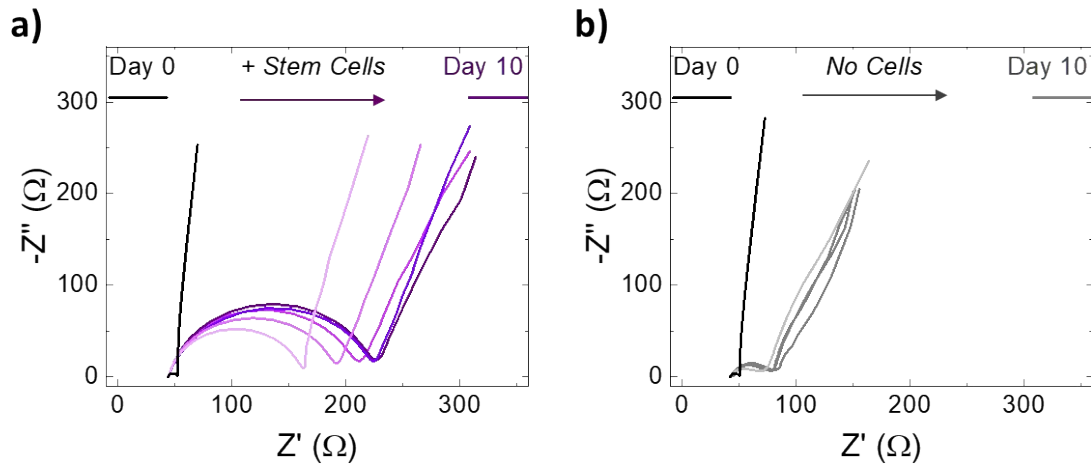

**Figure S11:** Nyquist plots for **a)** devices seeded with hADSCs and **b)** identically prepared devices not seeded with hADSCs.

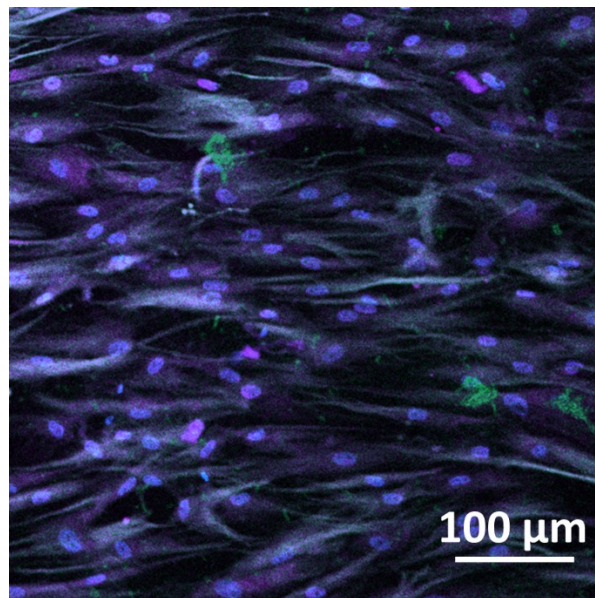

**Figure S12:** Immunofluorescence staining assay of undifferentiated hADSCs grown on a 2D PEDOT:PSS coated glass cover slip 6 days in culture. Stained for microtubule-associated protein 2 (MAP-2 - green), neuronal nuclear protein (NeuN - purple), and cell nuclei (HOECHST - blue).

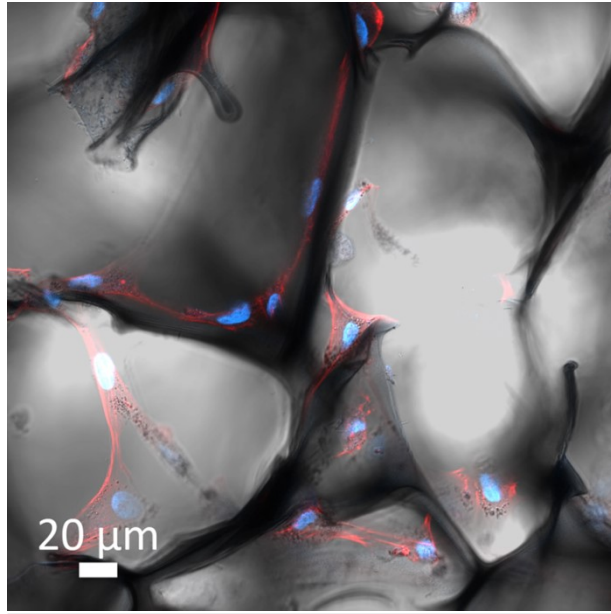

**Figure S13:** Combined bright field and fluorescent microscope image of neuron-like cells differentiated from hADSCs within a PEDOT:PSS-based conducting polymer scaffold.
